# Supplementary material for: Of cattle and feasts: Multi-isotope investigation of animal husbandry and communal feasting at Neolithic Makriyalos, northern Greece
Source: PLoS One. 2018 Jun 7;13(6):e0194474. doi: 10.1371/journal.pone.0194474 (PMC5991682; doi:10.1371/journal.pone.0194474)
Supplement: S1 Table — (XLSX) [file pone.0194474.s002.xlsx]

## Sheet: Makriyalos raw data CN (context
S1 Table
ID	Specimen no.	Species	Unit	Context	Feasting	Sample type
MAK127	MKL401	emmer	L 0133	Ditch A	no	grain
MAK128	MKL414/419	emmer	L 0124	Ditch A	no	grain
MAK129	MKL414/419	emmer	L 0124	Ditch A	no	grain
MAKP01	MKL468	emmer	L 0141	Ditch A	no	grain
MAKP02	MKL414/419	emmer	L 0124	Ditch A	no	grain
MAK201	8 1	cattle	Pi 0564016	Pit 212	yes	post-cranial
MAK202	8 2	cattle	Pi 0661016	Pit 212	yes	post-cranial
MAK203	8 3	cattle	Pi 0662019	Pit 212	yes	post-cranial
MAK204	8 4	cattle	Pi 0661016	Pit 212	yes	post-cranial
MAK205	8 5	cattle	Pi 0564053	Pit 212	yes	post-cranial
MAK216	8 16	cattle	K 0273036	Ditch	no	post-cranial
MAK217	8 17	cattle	K 0291007	Ditch	no	post-cranial
MAK218	8 18	cattle	Xi 099199	Ditch	no	post-cranial
MAK220	8 20	cattle	K 0272052	Ditch	no	post-cranial
MAK232	8 32	cattle	Xi 0584009	Pit 214	yes	post-cranial
MAK233	8 33	cattle	Xi 0584023	Pit 214	yes	post-cranial
MAK235	8 35	cattle	Xi 0584002	Pit 214	yes	post-cranial
MAK236	8 36	cattle	O 0672020	Habitation	no	post-cranial
MAK401	H 002	cattle	L 0124027	Ditch	no	post-cranial
MAK219	8 19	cattle	Fi 0273029	Ditch	no	post-cranial
MAK231	8 31	cattle	Xi 0584009	Pit 214	yes	post-cranial
MAK234	8 34	cattle	Xi 0582013	Pit 214	yes	post-cranial
MAK237	8 37	cattle	R 0642012	Habitation	no	post-cranial
MAK238	8 38	cattle	L 0312002	Habitation	no	post-cranial
MAK239	8 39	cattle	O 0673010	Habitation	no	post-cranial
MAK211	8 11	goat	Pi 0573024	Pit 212	yes	post-cranial
MAK212	8 12	goat	Pi 0573017	Pit 212	yes	post-cranial
MAK213	8 13	goat	Pi 0573050	Pit 212	yes	post-cranial
MAK214	8 14	goat	Pi 0564020	Pit 212	yes	post-cranial
MAK215	8 15	goat	Pi 0571027	Pit 212	yes	post-cranial
MAK221	8 21	goat	K 0352001	Ditch	no	post-cranial
MAK222	8 22	goat	R 0424030	Ditch	no	post-cranial
MAK223	8 23	goat	L 0141002	Ditch	no	post-cranial
MAK224	8 24	goat	L 0142095	Ditch	no	post-cranial
MAK225	8 25	goat	I 0233004	Ditch	no	post-cranial
MAK241	8 41	goat	Xi 0584002	Pit 214	yes	post-cranial
MAK242	8 42	goat	Xi 0681012	Pit 214	yes	post-cranial
MAK243	8 43	goat	Xi 0581007	Pit 214	yes	post-cranial
MAK244	8 44	goat	Xi 0683003	Pit 214	yes	post-cranial
MAK245	8 45	goat	Xi 0574011	Pit 214	yes	post-cranial
MAK252	8 52	goat	R 0532026	Habitation	no	post-cranial
MAK253	8 53	goat	O 0672022	Habitation	no	post-cranial
MAK254	8 54	goat	R 0424028	Habitation	no	post-cranial
MAK255	8 55	goat	R 0433029	Habitation	no	post-cranial
MAK403	H 004	human	K 0273011	Ditch A	no	post-cranial
MAK404	H 005	human	I 0581006	Ditch A	no	post-cranial
MAK405	H 006	human	Xi 0713006	Ditch A	no	post-cranial
MAK406	H 007	human	Xi 0454009	Ditch A	no	post-cranial
MAK408	H 009	human	L 0131011	Ditch A	no	post-cranial
MAK409	H 010	human	L 0141026	Ditch A	no	post-cranial
MAK410	H 11	human	L 0124013	Ditch A	no	post-cranial
MAK411	H 12	human	L 0413010	Habitation	no	post-cranial
MAK414	H 15	human	Phi 0262032	Ditch A	no	post-cranial
MAK416	H 17	human	Pi 0561035	Pit 212	no	post-cranial
MAK417	H 18	human	Xi 0444006	Ditch A	no	post-cranial
MAK420	H 21	human	I 0504001	Ditch A	no	post-cranial
MAK261	8 61	red deer	Xi 0532004	Ditch	no	post-cranial
MAK262	8 62	red deer	R 0664002	Habitation	no	post-cranial
MAK263	8 63	red deer	R 0644003	Habitation	no	post-cranial
MAK206	8 6	sheep	Pi 0563069	Pit 212	yes	post-cranial
MAK207	8 7	sheep	Pi 0571012	Pit 212	yes	post-cranial
MAK210	8 10	sheep	Pi 0571043	Pit 212	yes	post-cranial
MAK226	8 26	sheep	Xi 0631027	Ditch A	no	post-cranial
MAK229	8 29	sheep	L 0141036	Ditch	no	post-cranial
MAK230	8 30	sheep	Xi 0444005	Ditch	no	post-cranial
MAK246	8 46	sheep	Xi 0582004	Pit 214	yes	post-cranial
MAK247	8 47	sheep	Xi 0584012	Pit 214	yes	post-cranial
MAK249	8 49	sheep	Xi 0584001	Pit 214	yes	post-cranial
MAK250	8 50	sheep	Xi 0682006	Pit 214	yes	post-cranial
MAK256	8 56	sheep	R 0642003	Habitation	no	post-cranial
MAK257	8 57	sheep	O 0681015	Habitation	no	post-cranial
MAK259	8 59	sheep	O 0672015	Habitation	no	post-cranial
MAK208	8 8	sheep	Pi 0562019	Pit 212	yes	post-cranial
MAK209	8 9	sheep	Pi 0571035	Pit 212	yes	post-cranial
MAK227	8 27	sheep	L 0124017	Ditch	no	post-cranial
MAK228	8 28	sheep	R 0424013	Ditch	no	post-cranial
MAK248	8 48	sheep	Xi 0583005	Pit 214	yes	post-cranial
MAK258	8 58	sheep	R 0532049	Habitation	no	post-cranial
MAK260	8 60	sheep	O 0674020	Habitation	no	post-cranial
MKS001	MK69	cattle	R 0654080	Ditch G	no	mandible
MKS002	MK64	cattle	R 0424___	Ditch G	no	mandible
MKS004	MK66	cattle	X 0121014	Borrow pit	no	mandible
MKS005	MK65	cattle	O 0681027	Habitation	no	mandible
MKS006	MK63	cattle	R 0642017	Ditch G	no	mandible
MKS007	MK67	cattle	R 0543090	Ditch G	no	mandible
MKS008	MK62	cattle	R 0654031	Ditch G	no	mandible
MKS009	MK70	cattle	R 0654020	Ditch G	no	mandible
MKS012	MK59	cattle	Pi 0564041	Pit 212	yes	mandible
MKS016	MK54	cattle	Pi 0564018	Pit 213	yes	mandible
MKS017	MK60	cattle	Pi 0572031	Pit 214	yes	mandible
MKS018	MK55	cattle	Pi 0563039	Pit 215	yes	mandible
MKS105	MK19	sheep	Pi 0572012	Pit 216	yes	mandible
MKS106	MK20	sheep	Pi 0571035	Pit 217	yes	mandible
MKS107	MK36	sheep	O 0672022	Habitation	no	mandible
