# Supplementary material for: Of cattle and feasts: Multi-isotope investigation of animal husbandry and communal feasting at Neolithic Makriyalos, northern Greece
Source: PLoS One. 2018 Jun 7;13(6):e0194474. doi: 10.1371/journal.pone.0194474 (PMC5991682; doi:10.1371/journal.pone.0194474)
Supplement: S2 Table — (XLSX) [file pone.0194474.s003.xlsx]

## Sheet: Makriyalos raw data CN (values)
S2 Table
ID	Species	Sample type	δ13CVPDB	δ13Ccorrected	δ13C SD	%C	Δ13C	δ15NAIR	δ15Ncorrected	δ15N SD	%N	CN	Measured by
MAKP01	emmer	grain	-24	-24.1	0.5	60.4	18	0.4	0.1	0.3	2.2	32.4	PV
MAKP02	emmer	grain	-24.6	-24.7	0.5	56.2	18.7	2.3	2	0.3	2.4	27.2	PV
MAK127	emmer	grain	-24.27	-24.4	0.1	62.9	18.3	1.21	0.9	0.4	3.6	20	RF
MAK128	emmer	grain	-24.53	-24.6	0.1	63.1	18.6	1.22	0.9	0.4	3.1	24	RF
MAK129	emmer	grain	-24.5	-24.6	0.1	63.5	18.6	1.69	1.4	0.4	3.8	19.3	RF
MAK201	cattle	post-cranial	-13.9		0.9	41.7		5.9		1.1	15.1	3.2	PV/RF
MAK202	cattle	post-cranial	-16.1		0.9	38.1		3.3		1.1	13.7	3.2	PV/RF
MAK203	cattle	post-cranial	-16.3		0.1	41.4		5.3		0.1	14.8	3.3	PV/RF
MAK204	cattle	post-cranial	-18.6		0.1	41.4		5.2		0.1	14.9	3.2	PV/RF
MAK205	cattle	post-cranial	-13.6		0.9	41.7		3.4		1.1	15.2	3.2	PV/RF
MAK216	cattle	post-cranial	-15		0.1	42		5.4		0.1	15.2	3.2	PV/RF
MAK217	cattle	post-cranial	-14		0.9	41.4		5.2		1.1	14.9	3.2	PV/RF
MAK218	cattle	post-cranial	-15.7		0.1	42.1		6.5		0.1	14.9	3.3	PV/RF
MAK220	cattle	post-cranial	-15.5		0.1	41.2		5.3		0.1	15	3.2	PV/RF
MAK232	cattle	post-cranial	-15.8		0.1	40.4		6.2		0.1	14.4	3.3	PV/RF
MAK233	cattle	post-cranial	-14.7		0.1	45.8		3.6		0.1	16.4	3.3	PV/RF
MAK235	cattle	post-cranial	-18.9		0.1	41.9		6.4		0.1	15.1	3.2	PV/RF
MAK236	cattle	post-cranial	-17.1		0.1	42.6		5.9		0.1	15.3	3.2	PV/RF
MAK401	cattle	post-cranial	-15.6		0.1	43.7		4.5		0.1	15.8	3.2	PV/RF
MAK219	cattle	post-cranial	-21.15		0.0873839	47.2		5.22		0.4	16	3.4	PV/RF
MAK231	cattle	post-cranial	-14.65		0.0873839	41.1		3.92		0.4	14.6	3.3	PV/RF
MAK234	cattle	post-cranial	-16.74		0.0873839	38.1		4.8		0.4	13.2	3.4	PV/RF
MAK237	cattle	post-cranial	-12.27		0.0873839	40.4		5.39		0.4	14.4	3.3	PV/RF
MAK238	cattle	post-cranial	-17.41		0.0873839	41.7		4.84		0.4	14.9	3.3	PV/RF
MAK239	cattle	post-cranial	-16.63		0.0873839	42		4.53		0.4	14.7	3.3	PV/RF
MAK211	goat	post-cranial	-19.8		0.1	40.3		3.4		0.1	14.3	3.3	PV/RF
MAK212	goat	post-cranial	-19.2		0.1	41.9		5.3		0.1	15	3.3	PV/RF
MAK213	goat	post-cranial	-18.3		0.1	42.2		4.5		0.1	15.2	3.2	PV/RF
MAK214	goat	post-cranial	-20.7		0.9	39.2		6.3		1.1	14.2	3.2	PV/RF
MAK215	goat	post-cranial	-19		0.1	41.8		4.9		0.1	15.1	3.2	PV/RF
MAK221	goat	post-cranial	-19.9		0.9	39.4		4.3		1.1	14.1	3.3	PV/RF
MAK222	goat	post-cranial	-19.7		0.9	42.4		4.8		1.1	15.3	3.2	PV/RF
MAK223	goat	post-cranial	-19.6		0.1	41.9		4.7		0.1	15.1	3.2	PV/RF
MAK224	goat	post-cranial	-19		0.9	38.9		5.3		1.1	14	3.2	PV/RF
MAK225	goat	post-cranial	-20.4		0.1	38.4		4.8		0.1	13.7	3.3	PV/RF
MAK241	goat	post-cranial	-20.6		0.1	38.8		6.4		0.1	13.6	3.3	PV/RF
MAK242	goat	post-cranial	-19.5		0.1	41.5		3.9		0.1	14.8	3.3	PV/RF
MAK243	goat	post-cranial	-19.9		0.1	41		3.5		0.1	14.8	3.2	PV/RF
MAK244	goat	post-cranial	-19.9		0.1	39.2		5.2		0.1	14	3.3	PV/RF
MAK245	goat	post-cranial	-20.3		0.9	41.6		2.9		1.1	15	3.2	PV/RF
MAK252	goat	post-cranial	-19.1		0.9	39.8		5.3		1.1	14.4	3.2	PV/RF
MAK253	goat	post-cranial	-20		0.1	43.8		3.8		0.1	15.7	3.3	PV/RF
MAK254	goat	post-cranial	-20.1		0.1	42.8		4.8		0.1	15.5	3.2	PV/RF
MAK255	goat	post-cranial	-19.1		0.1	39.9		3.5		0.1	14.4	3.2	PV/RF
MAK403	human	post-cranial	-20.2706		0.0877555	42.1339		8.90959		0.177339	14.9498	3.28808	PV/RF
MAK404	human	post-cranial	-19.8073		0.088293	41.8821		8.4413		0.175234	15.1384	3.22771	PV/RF
MAK405	human	post-cranial	-19.9129		0.0877737	42.4152		7.72375		0.165229	15.2186	3.25158	PV/RF
MAK406	human	post-cranial	-20.2667		0.0860407	43.2025		8.22288		0.172179	15.5756	3.23601	PV/RF
MAK408	human	post-cranial	-20.4083		0.0853495	41.6766		6.66557		0.150661	15.0162	3.23801	PV/RF
MAK409	human	post-cranial	-20.2687		0.087765	44.66		8.83585		0.176304	16.1857	3.2191	PV/RF
MAK410	human	post-cranial	-20.3118		0.0875458	42.3582		5.45417		0.129738	15.4729	3.19384	PV/RF
MAK411	human	post-cranial	-20.7664		0.930654	38.3222		6.61826		1.09563	13.4686	3.31951	PV/RF
MAK414	human	post-cranial	-20.0794		0.0869572	42.033		8.47319		0.175681	15.2484	3.21597	PV/RF
MAK416	human	post-cranial	-20.0737		0.0887601	42.1719		7.36627		0.155813	15.1578	3.24589	PV/RF
MAK417	human	post-cranial	-20.6021		0.0844064	43.0506		6.6944		0.151055	15.5809	3.22354	PV/RF
MAK420	human	post-cranial	-19.9923		0.0873839	42.8082		7.3801		0.160472	15.3823	3.24677	PV/RF
MAK261	red deer	post-cranial	-21.34		0.0873839	44.7		6.41		0.4	15.7	3.3	PV/RF
MAK262	red deer	post-cranial	-21.09		0.0873839	42.5		3.24		0.4	15	3.3	PV/RF
MAK263	red deer	post-cranial	-18.85		0.0873839	39.7		5.19		0.4	13.8	3.3	PV/RF
MAK206	sheep	post-cranial	-20.3		0.1	41.4		3.9		0.1	14.8	3.3	PV/RF
MAK207	sheep	post-cranial	-18.7		0.1	45.3		6		0.1	16.3	3.2	PV/RF
MAK210	sheep	post-cranial	-17.2		0.1	42		7.5		0.2	15.1	3.2	PV/RF
MAK226	sheep	post-cranial	-19.4		0.9	41.5		6.1		1.1	15.1	3.2	PV/RF
MAK229	sheep	post-cranial	-19.2		0.1	41.9		5.4		0.1	15	3.3	PV/RF
MAK230	sheep	post-cranial	-19.1		0.9	41.9		4.2		1.1	15.1	3.2	PV/RF
MAK246	sheep	post-cranial	-18.7		0.9	39.7		4.4		1.1	14.3	3.2	PV/RF
MAK247	sheep	post-cranial	-18.6		0.1	41.7		5.8		0.1	15	3.2	PV/RF
MAK249	sheep	post-cranial	-17.8		0.9	39.4		4.1		1.1	14.1	3.3	PV/RF
MAK250	sheep	post-cranial	-18.2		0.9	39.8		5.7		1.1	14.1	3.3	PV/RF
MAK256	sheep	post-cranial	-18.6		0.1	41.9		4.8		0.1	15.2	3.2	PV/RF
MAK257	sheep	post-cranial	-19.1		0.1	43.6		4.7		0.1	15.5	3.3	PV/RF
MAK259	sheep	post-cranial	-20		0.1	42.5		6		0.1	15.3	3.2	PV/RF
MAK208	sheep	post-cranial	-18.36		0.0873839	38.3		5.13		0.4	13.1	3.4	PV/RF
MAK209	sheep	post-cranial	-18.94		0.0873839	29.7		4.83		0.4	9.8	3.5	PV/RF
MAK227	sheep	post-cranial	-20.56		0.0873839	39.9		5.21		0.4	14	3.3	PV/RF
MAK228	sheep	post-cranial	-18.85		0.0873839	40.8		4.97		0.4	14.4	3.3	PV/RF
MAK248	sheep	post-cranial	-19.81		0.0873839	33.9		5.39		0.4	12.6	3.1	PV/RF
MAK258	sheep	post-cranial	-19.12		0.0873839	48.4		5.18		0.4	17.3	3.3	PV/RF
MAK260	sheep	post-cranial	-19.86		0.0873839	45.3		5.3		0.4	16	3.3	PV/RF
MKS001	cattle	mandible	-10.3		0.1	41		5.2		0.2	14.4	3.3	PV
MKS002	cattle	mandible	-16.6		0.1	29.1		5.5		0.2	10.4	3.3	PV
MKS004	cattle	mandible	-18.6		0.1	24.8		8.5		0.2	8.6	3.4	PV
MKS005	cattle	mandible	-18.2		0.1	38.3		4.6		0.1	13.4	3.3	PV
MKS006	cattle	mandible	-17.3		0.1	40		3.5		0.1	14.4	3.2	PV
MKS007	cattle	mandible	-18.5		0.1	16.9		3.3		0.1	5.5	3.6	PV
MKS008	cattle	mandible	-14.5		0.1	40.6		6.8		0.2	14.8	3.2	PV
MKS009	cattle	mandible	-13.6		0.1	43.6		5.8		0.2	15.4	3.3	PV
MKS012	cattle	mandible	-12.1		0.1	36.9		6.3		0.2	13	3.3	PV
MKS016	cattle	mandible	-17.2		0.1	37.4		6.4		0.2	13.6	3.2	PV
MKS017	cattle	mandible	-18.9		0.1	22.5		4.8		0.1	7.5	3.5	PV
MKS018	cattle	mandible	-17.1		0.1	27.5		5.6		0.2	9.7	3.3	PV
MKS105	sheep	mandible	-19		0.2	27.5		4.6		0.3	8.9	3.6	PV
MKS106	sheep	mandible	-18.1		0.5	30.7		4.5		0.9	10.5	3.4	PV
MKS107	sheep	mandible	-20.2		0.6	34		4.2		1	11.7	3.4	PV
